# Supplementary material
Source: Springer Nature journal article supplement (https://www.springermedizin.de/resource/supplementary/13058_2010_2859_MOESM12_ESM.pdf/9702726)

**A**

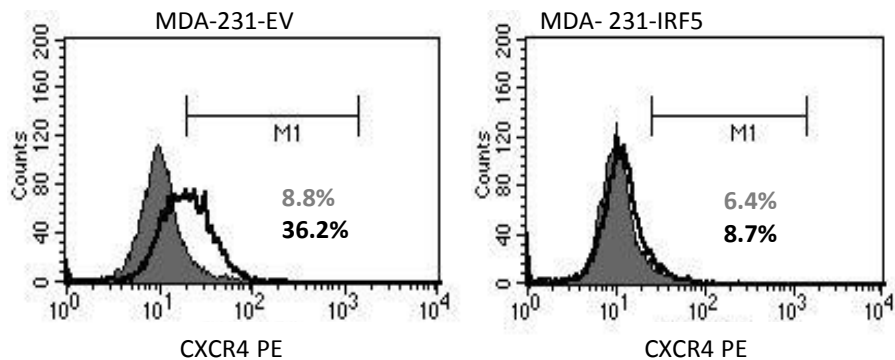

**B**

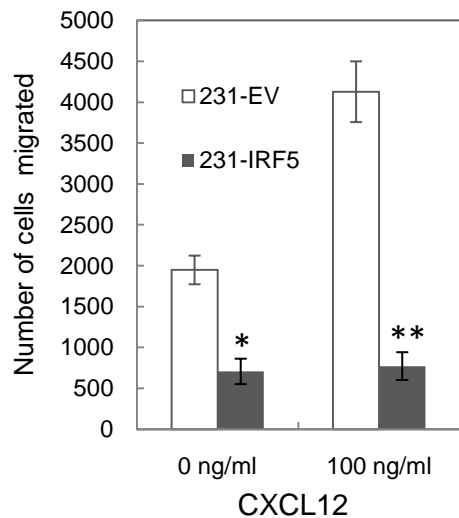

**C**

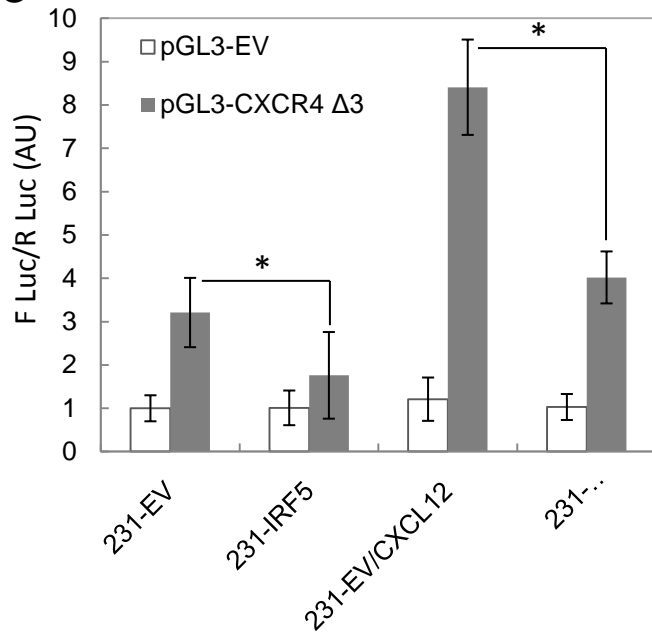

Supplement: MOESM12 [file 9702726]
